# Supplementary material for: Beyond the Digital Competencies of Medical Students: Concerns over Integrating Data Science Basics into the Medical Curriculum
Source: MDPI journal article supplement (doi:10.3390/ijerph192315958), 2022-11-30
Supplement: s1 [file s1]

**Table S1.** Declared on-line attendance, students' overall satisfaction with life and on-line professional activity, and the PHQ-9 total scoring. Data were separately gathered as a recollection of the spring in 2020 (during the pandemic outbreak) and in regard to the ongoing first semester of the academic year 2020-2021. The improvement on all aspects was significant during the latter period, associated with more stability in life in general. The contribution of personal commitment to attend the academic activities was also significant (there was a statistically significant linear association between the attendance levels in the two periods, both with exclusively on-line activities). The Cronbach' alpha value for the PHQ-9 reflects good reliability.

| Question/ Variable                                                                                             |                                                       | All<br>N=121  | Males<br>N=28    | Females<br>N=84 | Not declared<br>N=9 | p-value<br>(a),(b),(c),(d),(e) |
|----------------------------------------------------------------------------------------------------------------|-------------------------------------------------------|---------------|------------------|-----------------|---------------------|--------------------------------|
| Q62                                                                                                            | Age <sup>(a)</sup>                                    | 22.17 ± 0.843 | 22.25 ± 0.645    | 22.15 ± 0.938   | 22.11 ± 0.333       | 0.854                          |
| Q2                                                                                                             | On line education <sup>(b)</sup>                      | 3 (2 – 4)     | 3 (3 – 4)        | 3 (2 – 4)       | 3 (2 – 3)           | 0.298                          |
| Q3                                                                                                             | On-line work satisfaction <sup>(b)</sup>              | 3 (2 – 4)     | 3 (2 – 3.5)      | 3 (2 – 4)       | 2 (2 – 3)           | 0.185                          |
| Q4                                                                                                             | Experience in spring 2020 <sup>(b)</sup>              | 2 (2 – 3)     | 2.5 (2 – 3.5)    | 2 (2 – 3)       | 2 (1 – 3)           | 0.212                          |
| Q5                                                                                                             | Professionally prepared in spring 2020 <sup>(b)</sup> | 2 (2 – 3)     | 2 (2 – 3)        | 2 (2 – 3)       | 2 (1 – 3)           | 0.659                          |
| Q2 vs. Q4; Wilcoxon signed rank test, p < 0.001**                                                              |                                                       |               |                  |                 |                     |                                |
| Q3 vs. Q5; Wilcoxon signed rank test, p < 0.001**                                                              |                                                       |               |                  |                 |                     |                                |
| Q6                                                                                                             | Attendance spring 2020 <sup>(c)</sup>                 |               |                  |                 |                     |                                |
|                                                                                                                | less than 25%                                         | 14 (11.6%)    | 1 (3.6%)         | 12 (14.3%)      | 1 (11.1%)           | 0.795                          |
|                                                                                                                | 49-25%                                                | 18 (14.9%)    | 5 (17.6%)        | 11 (13.1%)      | 2 (22.2%)           |                                |
|                                                                                                                | 74-50%                                                | 22 (18.2%)    | 5 (17.6%)        | 16 (19%)        | 1 (11.1%)           |                                |
|                                                                                                                | 75-100%                                               | 67 (55.4%)    | 17 (60.7%)       | 45 (53.6%)      | 5 (55.6%)           |                                |
| Q7                                                                                                             | On-line attendance current semester <sup>(c)</sup>    |               |                  |                 |                     |                                |
|                                                                                                                | less than 25%                                         | 2 (1.7%)      | –                | 1 (1.2%)        | 1 (11.1%)           | 0.123                          |
|                                                                                                                | 49-25%                                                | 5 (4.1%)      | 1 (3.6%)         | 3 (3.6%)        | 1 (11.1%)           |                                |
|                                                                                                                | 74-50%                                                | 13 (10.7%)    | 1 (3.6%)         | 10 (11.9%)      | 2 (22.2%)           |                                |
|                                                                                                                | 75-100%                                               | 101 (83.5%)   | 26 (92.9%)       | 70 (83.3%)      | 5 (55.6%)           |                                |
| Q6 vs. Q7; statistical test for linear association, Monte-Carlo simulation (10000 sampled tables), p = 0.003** |                                                       |               |                  |                 |                     |                                |
| Q8                                                                                                             | Life satisfaction <sup>(d)</sup>                      | 7 (4.5 – 8)   | 7 (6 – 8.5)      | 7 (4 – 8)       | 6 (3 – 6)           | 0.029*                         |
| Q9                                                                                                             | Health satisfaction <sup>(d)</sup>                    | 9 (8 – 9.5)   | 9 (8 – 10)       | 9 (8 – 9)       | 8 (6 – 9)           | 0.284                          |
| Q10                                                                                                            | Perceived support from University <sup>(d),#</sup>    | 7 (4 – 8) #   | 6 (2.5 – 8) #    | 7 (4 – 8)       | 5 (3 – 7)           | 0.594                          |
| Q11 to Q20                                                                                                     | PHQ-9 total27 <sup>(e)</sup>                          | 8 (5 – 11)    | 7.5 (4.5 – 10.5) | 8 (5 – 11)      | 9 (6 – 11)          | 0.604                          |
| 9 items, Cronbach's alpha = 0.885                                                                              |                                                       |               |                  |                 |                     |                                |

<sup>(a)</sup> mean ± std dev; ANOVA statistical test for significance of observed differences between the three-sex groups

<sup>(b)</sup> rank scores between 1 and 5; median (IQR); Kruskal-Wallis statistical test for significance of observed differences between the three-sex groups

<sup>(c)</sup> counts (%); Chi-square statistical test for significance of observed differences between the three-sex groups (either asymptotic, or Monte-Carlo simulation based on 10000 samples)

<sup>(d)</sup> mark between 1 and 10; median (IQR); Kruskal-Wallis statistical test for significance of observed differences between the three-sex groups

<sup>(e)</sup> median (IQR); Kruskal-Wallis statistical test for significance of observed differences between the three-sex groups

**Notations:** IQR inter-quartile range; std dev, standard deviation; PHQ-9, nine-item Patient Health Questionnaire

# one missing value for a male respondent

\*,\*\* statistical significance, p < 0.05, p < 0.01

**Table S2.** Self-assessed ICT abilities for independent on-line activities; and opinions of the prospective applicability of e-learning and on-line activities in medical education.

| Question/ Variable |                                                                          | All<br>N=121 | Males<br>N=28 | Females<br>N=84 | Not declared<br>N=9 | p-value <sup>(a),(b)</sup> |
|--------------------|--------------------------------------------------------------------------|--------------|---------------|-----------------|---------------------|----------------------------|
| Q55                | ICT abilities for on-line activities <sup>(a)</sup>                      | 4 (3 – 5)    | 3 (4 – 5)     | 3 (4 – 5)       | 3 (3 – 5)           | 0.866                      |
| Q56                | Motivated to attend <sup>(a)</sup>                                       | 3 (1 – 4)    | 3 (2 – 4)     | 3 (1 – 4)       | 2 (1 – 3)           | 0.206                      |
| Q57                | On-line activities are a valid complement to face-to-face <sup>(a)</sup> | 3 (2 – 4)    | 3 (2 – 4)     | 3 (1 – 4)       | 3 (2 – 4)           | 0.898                      |
| Q58                | Preferred lectures in the future <sup>(b)</sup>                          |              |               |                 |                     |                            |
|                    | no preference                                                            | 2 (1.7%)     | –             | 2 (2.4%)        | –                   |                            |
|                    | face-to-face classical teaching                                          | 50 (41.3%)   | 10 (35.7%)    | 35 (41.7%)      | 5 (55.6%)           | 0.885                      |
|                    | eLearning                                                                | 13 (10.7%)   | 4 (14.3%)     | 8 (9.5%)        | 1 (11.1%)           |                            |
|                    | combination                                                              | 56 (46.3%)   | 14 (50%)      | 39 (46.4%)      | 3 (33.3%)           |                            |

<sup>(a)</sup> rank scores between 1 and 5; median (IQR); Kruskal-Wallis statistical test for significance of observed differences between the three-sex groups

<sup>(b)</sup> counts (%); Chi-square statistical test for significance of observed differences between the three-sex groups (either asymptotic, or Monte-Carlo simulation based on 10000 samples)

**Notation:** IQR inter-quartile range

**Supplementary file to paper**

*"Beyond the digital competencies of medical students: concerns over integrating data science basics into the medical curriculum"*

**Table S3.** Two-by-two correlation matrix between the PHQ-9 scoring, satisfaction with on-line education, life, health and perceived support from University, and the overall marks students gave to the data science courses.

| Variable                                       |   | PHQ-9 total | On line education <sup>(</sup> | On-line work satisfaction | Life satisfaction | Health satisfaction | Perceived support from University <sup>#</sup> | Usefulness BMI & Biostats | mark BMI      | mark Biostats |
|------------------------------------------------|---|-------------|--------------------------------|---------------------------|-------------------|---------------------|------------------------------------------------|---------------------------|---------------|---------------|
| PHQ-9 total                                    | R | 1.000       | -.248**                        | -.314**                   | -.395**           | -.433**             | -.303**                                        | -.260**                   | -.241**       | -.270**       |
|                                                | p | .           | 0.006                          | <0.001                    | <0.001            | <0.001              | 0.001                                          | 0.004                     | 0.008         | 0.003         |
|                                                | N | 121         | 121                            | 121                       | 121               | 121                 | 120                                            | 121                       | 121           | 121           |
| On line education <sup>(</sup>                 | R | -.248**     | 1.000                          | <b>.686**</b>             | <b>.521**</b>     | .345**              | <b>.612**</b>                                  | .409**                    | .444**        | .327**        |
|                                                | p | 0.006       | .                              | <0.001                    | <0.001            | <0.001              | <0.001                                         | <0.001                    | <0.001        | <0.001        |
|                                                | N | 121         | 121                            | 121                       | 121               | 121                 | 120                                            | 121                       | 121           | 121           |
| On-line work satisfaction                      | R | -.314**     | .686**                         | 1.000                     | .448**            | .274**              | .488**                                         | .364**                    | .306**        | .209*         |
|                                                | p | <0.001      | <0.001                         | .                         | <0.001            | 0.002               | <0.001                                         | <0.001                    | 0.001         | 0.021         |
|                                                | N | 121         | 121                            | 121                       | 121               | 121                 | 120                                            | 121                       | 121           | 121           |
| Life satisfaction                              | R | -.395**     | .521**                         | .448**                    | 1.000             | .403**              | .349**                                         | .260**                    | .360**        | .293**        |
|                                                | p | <0.001      | <0.001                         | <0.001                    | .                 | <0.001              | <0.001                                         | 0.004                     | . <0.001      | 0.001         |
|                                                | N | 121         | 121                            | 121                       | 121               | 121                 | 120                                            | 121                       | 121           | 121           |
| Health satisfaction                            | R | -.433**     | .345**                         | .274**                    | .403**            | 1.000               | .457**                                         | .277**                    | .333**        | .346**        |
|                                                | p | <0.001      | <0.001                         | 0.002                     | <0.001            | .                   | <0.001                                         | 0.002                     | <0.001        | <0.001        |
|                                                | N | 121         | 121                            | 121                       | 121               | 121                 | 120                                            | 121                       | 121           | 121           |
| Perceived support from University <sup>#</sup> | R | -.303**     | .612**                         | .488**                    | .349**            | .457**              | 1.000                                          | .487**                    | <b>.531**</b> | .409**        |
|                                                | p | 0.001       | <0.001                         | <0.001                    | <0.001            | <0.001              | .                                              | <0.001                    | <0.001        | <0.001        |
|                                                | N | 120         | 120                            | 120                       | 120               | 120                 | 120                                            | 120                       | 120           | 120           |
| Usefulness BMI & Biostats                      | R | -.260**     | .409**                         | .364**                    | .260**            | .277**              | .487**                                         | 1.000                     | <b>.591**</b> | <b>.581**</b> |
|                                                | p | 0.004       | <0.001                         | <0.001                    | 0.004             | 0.002               | . <0.001                                       | .                         | <0.001        | <0.001        |
|                                                | N | 121         | 121                            | 121                       | 121               | 121                 | 120                                            | 121                       | 121           | 121           |
| mark BMI                                       | R | -.241**     | .444**                         | .306**                    | .360**            | .333**              | .531**                                         | .591**                    | 1.000         | <b>.869**</b> |
|                                                | p | 0.008       | <0.001                         | 0.001                     | <0.001            | <0.001              | <0.001                                         | <0.001                    | .             | <0.001        |
|                                                | N | 121         | 121                            | 121                       | 121               | 121                 | 120                                            | 121                       | 121           | 121           |

**Supplementary file** to paper

*"Beyond the digital competencies of medical students: concerns over integrating data science basics into the medical curriculum"*

| Variable      |   | PHQ-9 total | On line education <sup>(</sup> | On-line work satisfaction | Life satisfaction | Health satisfaction | Perceived support from University <sup>#</sup> | Usefulness BMI & Biostats | mark BMI | mark Biostats |
|---------------|---|-------------|--------------------------------|---------------------------|-------------------|---------------------|------------------------------------------------|---------------------------|----------|---------------|
|               | R | -.270**     | .327**                         | .209*                     | .293**            | .346**              | .409**                                         | .581**                    | .869**   | 1.000         |
| mark Biostats | p | 0.003       | <0.001                         | 0.021                     | 0.001             | <0.001              | <0.001                                         | <0.001                    | <0.001   | .             |
|               | N | 121         | 121                            | 121                       | 121               | 121                 | 120                                            | 121                       | 121      | 121           |

**Notations:** BMI, biomedical informatics; N, number of paired values in the correlation analysis; p, p-value for statistical significance; R, Spearman coefficient of correlation. Significant R values over 0.5 are in bold.

<sup>#</sup> one missing value for a male respondent

**Supplementary file to paper**

*"Beyond the digital competencies of medical students: concerns over integrating data science basics into the medical curriculum"*

**Table S4.** Two-by-two correlation matrix between the PHQ-9 scoring, satisfaction with on-line education, life, health and perceived support from University, and the overall marks students gave to the EM course.

| Variable                                       |   | PHQ-9 total | On line education <sup>†</sup> | On-line work satisfaction | Life satisfaction | Health satisfaction | Perceived support from University <sup>#</sup> | mark EM practicals | mark EM lectures |
|------------------------------------------------|---|-------------|--------------------------------|---------------------------|-------------------|---------------------|------------------------------------------------|--------------------|------------------|
| PHQ-9 total                                    | R | 1.000       | -.248**                        | -.314**                   | -.395**           | -.433**             | -.303**                                        | -.144              | -.186*           |
|                                                | p | .           | 0.006                          | <0.001                    | <0.001            | <0.001              | 0.001                                          | 0.115              | 0.041            |
|                                                | N | 121         | 121                            | 121                       | 121               | 121                 | 120                                            | 121                | 121              |
| On line education <sup>†</sup>                 | R | -.248**     | 1.000                          | <b>.686**</b>             | <b>.521**</b>     | .345**              | <b>.612**</b>                                  | .440**             | .282**           |
|                                                | p | 0.006       | .                              | <0.001                    | <0.001            | <0.001              | <0.001                                         | <0.001             | 0.002            |
|                                                | N | 121         | 121                            | 121                       | 121               | 121                 | 120                                            | 121                | 121              |
| On-line work satisfaction                      | R | -.314**     | .686**                         | 1.000                     | .448**            | .274**              | .488**                                         | .336**             | .279**           |
|                                                | p | <0.001      | <0.001                         | .                         | <0.001            | 0.002               | <0.001                                         | <0.001             | 0.002            |
|                                                | N | 121         | 121                            | 121                       | 121               | 121                 | 120                                            | 121                | 121              |
| Life satisfaction                              | R | -.395**     | .521**                         | .448**                    | 1.000             | .403**              | .349**                                         | .307**             | .248**           |
|                                                | p | <0.001      | <0.001                         | <0.001                    | .                 | <0.001              | <0.001                                         | 0.001              | 0.006            |
|                                                | N | 121         | 121                            | 121                       | 121               | 121                 | 120                                            | 121                | 121              |
| Health satisfaction                            | R | -.433**     | .345**                         | .274**                    | .403**            | 1.000               | .457**                                         | .421**             | .297**           |
|                                                | p | <0.001      | <0.001                         | 0.002                     | <0.001            | .                   | <0.001                                         | <0.001             | 0.001            |
|                                                | N | 121         | 121                            | 121                       | 121               | 121                 | 120                                            | 121                | 121              |
| Perceived support from University <sup>#</sup> | R | -.303**     | .612**                         | .488**                    | .349**            | .457**              | 1.000                                          | .473**             | .449**           |
|                                                | p | 0.001       | <0.001                         | <0.001                    | <0.001            | <0.001              | .                                              | <0.001             | <0.001           |
|                                                | N | 120         | 120                            | 120                       | 120               | 120                 | 120                                            | 120                | 120              |
| mark EM practicals                             | R | -.144       | .440**                         | .336**                    | .307**            | .421**              | .473**                                         | 1.000              | <b>.730**</b>    |
|                                                | p | 0.115       | <0.001                         | <0.001                    | 0.001             | <0.001              | <0.001                                         | .                  | <0.001           |
|                                                | N | 121         | 121                            | 121                       | 121               | 121                 | 120                                            | 121                | 121              |
| mark EM lectures                               | R | -.186*      | .282**                         | .279**                    | .248**            | .297**              | .449**                                         | <b>.730**</b>      | 1.000            |
|                                                | p | 0.041       | 0.002                          | 0.002                     | 0.006             | 0.001               | <0.001                                         | <0.001             | .                |
|                                                | N | 121         | 121                            | 121                       | 121               | 121                 | 120                                            | 121                | 121              |

**Supplementary file** to paper

*"Beyond the digital competencies of medical students: concerns over integrating data science basics into the medical curriculum"*

---

**Notations:** EM, emergency medicine; N, number of paired values in the correlation analysis; p, p-value for statistical significance; R, Spearman coefficient of correlation. Significant R values over 0.5 are in bold.

# one missing value for a male respondent
